1 **The roles of lifestyle factors and genetic risk in the association between night**  
2 **shift work and cholelithiasis: a prospective cohort study.**

3 **Wangping He<sup>1,2†</sup>, Ningning Mi<sup>1,2†</sup>, Kecheng Jin<sup>1,2†</sup>, Boru Jin<sup>1,2</sup>, Ruyang Zhong<sup>1,2</sup>, Zhen Liu<sup>1,2</sup>,**  
4 **Yanyan Lin<sup>1,2</sup>, Ping Yue<sup>1,2</sup>, Bin Xia<sup>3</sup>, Qiangsheng He<sup>3</sup>, Fang Gao Smith<sup>4,5</sup>, Jie Zhen<sup>6,7</sup>, Jinqiu**  
5 **Yuan<sup>3\*</sup>, Wenbo Meng<sup>1,2\*</sup>**

6  
7 <sup>1</sup>The First School of Clinical Medicine, Lanzhou University, Lanzhou, Gansu, China.

8 <sup>2</sup>Department of General Surgery, The First Hospital of Lanzhou University, Lanzhou, Gansu, China.

9 <sup>3</sup>Clinical Research Center, Big Data Center, The Seventh Affiliated Hospital, Sun Yat-sen University,  
10 Shenzhen, Guangdong, China.

11 <sup>4</sup>Institute of Inflammation and Ageing, University of Birmingham, Birmingham, UK.

12 <sup>5</sup>University Hospitals Birmingham NHS Foundation Trust and Health Data Research UK Midlands,  
13 Birmingham, UK.

14 <sup>6</sup>Department of Endocrine and Metabolic Diseases, Shanghai Institute of Endocrine and Metabolic  
15 Diseases, Ruijin Hospital, Shanghai Jiaotong University School of Medicine, Shanghai, China.

16 <sup>7</sup>Shanghai National Clinical Research Center for Metabolic Diseases, Key Laboratory for Endocrine  
17 and Metabolic Diseases of the National Health Commission, Shanghai National Center for  
18 Translational Medicine, Ruijin Hospital, Shanghai Jiaotong University School of Medicine, Shanghai,  
19 China.

20

21 †These authors contributed equally to this work and shared the first authorship.

22 \*These authors are corresponding author.

23 **Correspondence**

24 Wenbo Meng, Department of General Surgery, The First Hospital of Lanzhou University, Lanzhou,  
25 730000, Gansu, China. Email: [mengwb@lzu.edu.cn](mailto:mengwb@lzu.edu.cn)

26 Jinqiu Yuan, Clinical Research Center, Big Data Center, The Seventh Affiliated Hospital, Sun Yat-sen  
27 University, Shenzhen, 518107, Guangdong, China. Email: [yuanjq5@mail.sysu.edu.cn](mailto:yuanjq5@mail.sysu.edu.cn).

28

29 Words count for abstract: 320

30 Words count for manuscript: 3680

31

32

33 **Abstract**

34 **Background:** Night shift work has been linked to various adverse health outcomes, but its relationship  
35 with incident cholelithiasis remains unclear. This study aims to investigate the association between  
36 night shift work and the risk of cholelithiasis, assess the potential modifying effects of genetic  
37 susceptibility, and explore the mediating roles of lifestyle factors.

38 **Methods:** A total of 219,810 subjects who were either in paid employment or self-employed were  
39 included in the UK Biobank. Information on current and lifetime employment were collected. Genetic  
40 risk was quantified and stratified by a polygenic risk score (PRS) incorporating 13 known  
41 cholelithiasis-associated loci. We used Cox proportional hazard models to investigate associations  
42 between night shift work and risk of cholelithiasis. Lifestyle factors measured at baseline were  
43 explored as potential mediators.

44 **Results:** During a median follow-up of 13.76 years, 6450 incidents of cholelithiasis were documented.  
45 Compared with day workers, the hazard ratio (HR) and 95% confidence interval (CI) of cholelithiasis  
46 was 1.09 (1.01, 1.17) for individuals with rarely/some night shifts and 1.18 (1.04, 1.35) for those with  
47 usual/permanent night shifts. Among the 62,558 participants who had reports on lifetime experience of  
48 night shift work, those with a higher frequency of night shifts and a longer length of each night shift  
49 were associated with an increased risk of cholelithiasis. Notably, individuals with usual/permanent  
50 night shifts and high genetic risk exhibited the highest risk of cholelithiasis (HR: 1.48, 95% CI: 1.21,  
51 1.81), with day workers at low genetic risk serving as the reference. Mediation analysis indicated that a  
52 substantial portion (24.6%) of the association was mediated by BMI, followed by unhealthy alcohol

53 intake (4.5%) and sedentary time (1.8%).

54 **Conclusions:** Night shift work is associated with an increased risk of cholelithiasis, with this  
55 relationship being largely mediated by lifestyle factors. These findings suggest that reducing the  
56 frequency and duration of night shifts may help mitigate the incidence of cholelithiasis among night  
57 shift workers, particularly for those with heightened genetic susceptibility.

58 **Keywords:** Night shift work, Cholelithiasis, Genetic risk, Lifestyle factors, Cohort study.

59

## 60 **Introduction**

61 Cholelithiasis is characterized by the presence of gallstones in the gallbladder or bile duct and  
62 affects 10–20% of the global adult population. In the United States, approximately 800,000  
63 cholecystectomies are performed annually for this condition, contributing to an estimated healthcare  
64 cost of nearly 6.0 billion dollars<sup>1</sup>. Given the rising prevalence of cholelithiasis, both primary and  
65 secondary prevention through the management of risk factors is essential<sup>2</sup>. While numerous risk factors,  
66 including obesity, smoking, dietary habits, and physical inactivity, have been associated with the  
67 development of cholelithiasis<sup>3</sup>, it is crucial to identify and control emerging risk factors early to reduce  
68 the healthcare burden associated with this disease.

69 With the increasing demands of modern society and the specialization of labor, shift work is  
70 becoming more prevalent among employees<sup>4</sup>. Shift work encompasses labor performed outside  
71 conventional daytime hours, including evening, night, rotating, or irregular shifts. It is estimated that  
72 15-20% of the working population in Europe and the United States are engaged in jobs that require  
73 night shifts<sup>4</sup>. Despite the necessity of shift work, substantial evidence suggests that night shift work  
74 disrupts the body's circadian rhythm and adversely affects metabolism and hormone secretion<sup>5-7</sup>.

75 Previous studies have linked night shift work to elevated risks of various health conditions,  
76 including cardiovascular disease, metabolic disorders, and certain cancers<sup>6,8-10</sup>, with the impact  
77 potentially intensifying with prolonged exposure to night shifts. While the mechanisms through  
78 which night shift work contributes to cardiovascular disease have been extensively studied<sup>11</sup>,  
79 there remains a significant knowledge gap concerning its association with cholelithiasis and the  
80 underlying pathways involved.

81 In addition to environmental and lifestyle factors, genetic predisposition also contributes to the  
82 development of cholelithiasis<sup>12</sup>. Large-scale genome-wide association studies (GWAS) have identified  
83 multiple independent genetic loci associated with cholelithiasis risk in European populations<sup>13,14</sup>. Since  
84 genetic susceptibility may modify the relationship between environmental and lifestyle factors and  
85 chronic disease, we also investigated the combined effects of genetic susceptibility and night shift work  
86 on the incidence of cholelithiasis.

87 To address these knowledge gaps, we utilized data from the UK Biobank to investigate the  
88 relationships between exposure to night shift work and cholelithiasis risk among 219,810 participants.  
89 Additionally, we integrated information on in-depth lifetime employment to examine the impact of the  
90 length and frequency of night shifts on cholelithiasis risk. For gene-environment interactions, we  
91 constructed a specific polygenic risk score (PRS) for cholelithiasis to investigate the combined effects  
92 of night shift work and genetic variations on the cholelithiasis risk. Considering that night shift work  
93 negatively impacts health through suboptimal health lifestyles<sup>15</sup> and certain lifestyle factors are likely  
94 to play a mediating role, simply adjusting for lifestyle factors as confounders may lead to  
95 overadjustment bias<sup>16</sup>. Our study further explored the mediating role of lifestyle factors between night  
96 shift work and cholelithiasis.

97

98 **Materials and Methods:**

99 **Study population**

100 The study population was drawn from the UK Biobank, a large-scale prospective cohort study that  
101 recruited over 500,000 individuals aged 37 to 73 years from 22 assessment centers across England,  
102 Scotland, and Wales between 2006 and 2010<sup>17</sup>. At baseline assessment, participants provided electronic  
103 consent and completed a touch-screen questionnaire along with a face-to-face interview. Trained staff  
104 collected various measurements, including height and weight. Participants also provided detailed  
105 information on their lifestyle, medical conditions, work hours, and demographic background. Health  
106 professionals inquired about medical history, health status, and medication use. Further details about  
107 the UK Biobank have been extensively documented in prior studies<sup>18,19</sup>.

108 For our analyses, we focused on participants who were in paid employment or self-employed  
109 (n = 286,248). After excluding participants with a history of cholelithiasis or cholecystectomy at  
110 baseline and missing lifestyle information and covariates, 219,810 participants were included in the  
111 primary analysis. Among them, 165,282 subjects were included in the subsequent gene-environment  
112 interaction analysis. Out of those, 62,558 subjects have complete lifetime employment information  
113 from the follow-up in 2015 through online questionnaires (**Supplementary Figure S1**).

114 **Exposure assessment**

115 In the UK Biobank, shift work is defined as a work schedule outside normal daytime working  
116 hours of 9:00 AM to 5:00 PM, which means working afternoons, evenings or nights or rotating through  
117 these shifts. Participants who indicated paid employment or self-employment were then asked "Does  
118 your work involve shift work?". If yes, participants were further asked whether their main job involved

119 night shifts, defined as "...a work schedule that involves working through the normal sleeping hours  
120 (e.g., from 12:00 a.m. to 6:00 a.m.)." Response options for both questions included "never/rarely,"  
121 "sometimes," "usually," or "always," with additional options for "prefer not to answer" and "do not  
122 know"<sup>20</sup>. Based on this information, participants' current night shift work status was categorized as  
123 "day workers" "shift, but rarely/some night shifts" and "usual/permanent night shifts".

124 In assessing lifetime employment, subjects reported each job ever worked, the number of years in  
125 each job, and the number of night shifts per month for each job. The detailed assessment method has  
126 been described in previous studies<sup>8,20</sup>. Based on the above information, we calculated the average  
127 frequency (number/per month) of night shifts and average length (hours) of each night shift for each  
128 participant.

#### 129 **Outcome ascertainment**

130 The primary outcome of interest in our study was cholelithiasis. Incident cholelithiasis was  
131 identified through linkage to the Health and Social Care Information Centre (in England and Wales)  
132 and the National Health Service Central Register (in Scotland). Outcome events were determined based  
133 on the International Classification of Diseases (ICD)-10 codes, specifically coded as K80.

#### 134 **Assessment of polygenic risk score (PRS) to cholelithiasis**

135 Genotyping in the UK Biobank was performed on two arrays, UK BiLEVE and UK Biobank  
136 Axiom. Genotyping, quality control, and imputation procedures have been previously described in  
137 detail<sup>21</sup>. The polygenic risk score (PRS) was computed using the cholelithiasis-associated single  
138 nucleotide polymorphisms (SNPs) identified in our previous study<sup>22</sup>. Detailed information about 13  
139 independent SNPs is provided in **Supplementary Table S1**. In short, the number of alleles (0, 1, or 2)  
140 for each individual was multiplied by the effect size of SNPs associated with cholelithiasis, and then

141 summed to derive PRS for all individuals in the UK Biobank<sup>23</sup>. The PRS was formulated as:  
142  $PRS = \beta_1 \times SNP_1 + \beta_2 \times SNP_2 + \dots + \beta_n \times SNP_n$  ( $\beta_n$  represents the effect size of the  
143 n-th SNP, and  $SNP_n$  is the genotype value for the n-th SNP, indicating the number of risk alleles (0, 1,  
144 or 2) present in the individual), where a higher score indicates a larger genetic susceptibility to  
145 cholelithiasis onset. We then determined whether participants were at high or low genetic risk for  
146 cholelithiasis based on the median value of PRS.

#### 147 **Assessment of covariates and lifestyle factors**

148 Age, gender, race, UK Biobank assessment centers, index of multiple deprivation, education,  
149 health rating, long-standing illness, multivitamin use and mineral use were considered as potential  
150 covariates. Index of multiple deprivation (IMD) reflecting socioeconomic status and different research  
151 centers acquired directly from the UK Biobank. Other sociodemographic characteristics (age, gender,  
152 race, education) were collected through questionnaires or verbal interviews at baseline and health status  
153 (health rating, long-standing illness, multivitamin use and mineral use) was collected through the  
154 self-reported medical history or hospitalization records.

155 Lifestyle factors included status of body mass index (BMI), physical activity, smoking status,  
156 alcohol intake, sleep duration, physical activity, sedentary time, and dietary characteristics. Weight and  
157 height were measured at baseline during the initial assessment center visit. Body mass index (BMI)  
158 was calculated as weight divided by height squared (kg/m<sup>2</sup>) at the initial assessment center visit.  
159 Smoking status, alcohol intake, sleep duration was assessed by the touch-screen questionnaire. Physical  
160 activity was assessed using the validated short International Physical Activity Questionnaire (IPAQ)<sup>24</sup>,  
161 which measures time spent on walking, and moderate and vigorous activities, which were also assessed  
162 by the touchscreen questionnaire. We used TV time as a measure of sedentary time<sup>25</sup>. Dietary

163 characteristics was assessed based on the intake of 5 dietary components (fruits, vegetables, fish, red  
164 meat, and processed meat) following the American Heart Association Guideline<sup>26</sup>. Healthy diet was  
165 defined as adherence 2 or more ideal diet components (**Supplementary Table S2**).

#### 166 **Statistical analysis**

167 Baseline characteristics were presented as mean (standard deviation, SD) for continuous variables,  
168 and as a number (percentage) for categorical variables. The person-years of follow-up were calculated  
169 from the assessment date for each participant until the first diagnosis of cholelithiasis, death, or the date  
170 of last follow-up (31 MAY 2022), whichever came first.

171 We employed Cox proportional hazards models were used to estimate the hazard ratios (HRs) and  
172 95% confidence intervals (CIs) for the association between current night shift work, average frequency  
173 of night shifts and average length of each night shift and incident cholelithiasis. Schoenfeld tests for the  
174 proportional hazard assumption were conducted in the UK Biobank, and no evidence of violation of  
175 this assumption was observed.

176 Three models with increasing adjustment were utilized to control potential confounders. Model 1  
177 was stratified by age, sex, and UK Biobank assessment centers. Model 2 was further adjusted for model  
178 1 plus race, index of multiple deprivation and education level. In model 3, we further adjusted for  
179 health rating, long-standing illness, multivitamin use and mineral use.

180 Kaplan-Meier analysis was performed to show the cumulative incidence rate across the different  
181 PRS categories in all participants. To evaluate to what extent the association of night shift work with  
182 cholelithiasis could be modified by genetic risk, joint effects were conducted for individuals with high  
183 and low genetic risk of cholelithiasis.

184 To enhance our understanding of how night shift work contributes to cholelithiasis, we probed the



185 potential mediation pathways. Lifestyle factors associated with night shift work and/or cholelithiasis  
186 were considered as potential mediators. These mediators were adjusted in the Cox models to examine  
187 whether, and to what extent, the HRs between night shift work and cholelithiasis were attenuated.  
188 Cause mediation analyses were based on counterfactual framework, which formally defines both direct  
189 and indirect effects, and were more robust to the various limitations of traditional adjustment-based  
190 mediation analysis<sup>27</sup>. Natural indirect effect (NIE), natural direct effect (NDE), and total effect (TE)  
191 were estimated by combining mediation and outcome models that adjusted for covariates in model 3.

192 The selected lifestyle factors were considered as potential mediators in a 3-step analysis. First, we  
193 estimated the association of night shift work with each lifestyle factor using the multivariate-adjusted  
194 linear or logistic regression models. Second, we used multivariate-adjusted Cox regression models to  
195 assess the associations of lifestyle factors significantly associated with night shift work with the risk of  
196 cholelithiasis (**Supplementary Table S3-4**). Third, we conducted mediating analyses based on lifestyle  
197 factors that were significantly associated with night work shift and cholelithiasis.

198 To examine the robustness of the results, several sensitivity analyses were performed. Firstly, we  
199 excluded incident cases that occurred within the first year, which could reduce the possibility of reverse  
200 causation, enhance temporal considerations, and allow a time window for the development of  
201 cholelithiasis. We further adjusted chronotype category in the models. All statistical analyses were  
202 performed using R software (version 4.3.2) and Python (version 3.7.13), and a two-sided p-value <  
203 0.05 was considered statistically significant.

204

## 205 **Results**

206 **Table 1** presents the baseline characteristics of the study population according to current night  
207 shift status. In general, among 219,810 participants, night shift workers were more likely to be younger,

208 male, nonwhite, less educated and more physically active and to have higher BMI, less healthy  
209 lifestyles, lower socioeconomic status and worse healthy status. The baseline characteristics of  
210 participants according to average monthly frequency of night shifts and average length of each night  
211 shift are presented in **Supplementary Table S5-6**. The participants possessing lifetime employment  
212 information exhibited comparable characteristics.

213       During a median follow-up of 13.76 years, we documented 6450 incidents of cholelithiasis. We  
214 first tested the association of current night shift work status and cholelithiasis (**Table 2**). In age-, sex-,  
215 and UK Biobank assessment centers-stratified model 1, compared with day workers, the HR (95% CI)  
216 of cholelithiasis was 1.21 (1.13, 1.30) in shift workers with rarely/some night shifts and 1.36 (1.20,  
217 1.55) in those with usual/permanent night shifts. In addition, this association was still significant after  
218 adjusting for race, index of multiple deprivation and education level in Model 2. Model 3 additionally  
219 adjusted for health rating, long-standing illness, multivitamin use and mineral use, and although  
220 estimates were further attenuated, results were overall comparable to model 2. In sensitivity analyses,  
221 after excluded cholelithiasis cases within the first year and further adjusted for chronotype category in  
222 the models (**Supplementary Table S7-8**), the results did not substantially differ from those observed  
223 in our aforementioned analyses.

224       Lifestyle factors were selected as potential mediators and these groups of mediators were adjusted  
225 in the Cox models to examine whether, and to what extent, the HRs between night shift work and  
226 cholelithiasis were attenuated (**Table 3**). Adjustments for the seven groups (dietary characteristics,  
227 smoking status, alcohol intake, physical activity, sleep duration, TV viewing, and BMI) of potential  
228 mediators are based on model 1. The strongest attenuation was seen following adjustment for BMI (the  
229 HR and 95% CI before adjustment: 1.09 [1.01,1.17] in rarely/some night shifts and 1.18 [1.04,1.35]

230 in rarely/some night shifts; after adjustment: 1.05 [0.98,1.13] in rarely/some night shifts and 1.12  
231 [0.99,1.28] in rarely/some night shifts).

232 Mediation analyses were summarized in **Table 4**. Lifestyle factors associated with both night shift  
233 work and outcomes were selected for mediating analysis (**Supplementary Table S3-4**). The primary  
234 mediators identified were unhealthy alcohol intake (4.5%), unhealthy TV viewing or sedentary time  
235 (1.8%), and BMI (24.2%). Detailed mediation charts illustrating the natural indirect effect (NIE) and  
236 natural direct effect (NDE) of each lifestyle factor are provided in **Supplementary Figure S2**.

237 We then examined the associations between lifetime night shift work (frequency and length) and  
238 the risk of cholelithiasis among 62,558 participants, with 1,578 incident cases. In fully adjusted models,  
239 we found that an increased frequency of night shifts was associated with a higher risk of cholelithiasis  
240 (**Table 5**). Compared with day workers, the HR (95% CI) of cholelithiasis was 1.18 (1.02, 1.37) in <  
241 8 night shifts/month and 1.26 (1.08, 1.46) in ≥8 night shifts/month. Additionally, we observed that  
242 night shift workers who undertook > 12 h/shift had the highest cholelithiasis risk (HR 1.25 [95% CI  
243 1.06, 1.48]) (**Table 6**).

244 The Kaplan-Meier curve showed that genetic risk was significantly associated with cholelithiasis  
245 (**Figure 1**). As expected, participants with high genetic risk had a broadly higher risk for cholelithiasis  
246 than those with a low genetic risk (HR 1.16, 95% CI [1.11,1.23]), suggesting that the PRS could  
247 effectively stratify risk for the cholelithiasis individuals. Furthermore, we observed significant joint  
248 effects between genetic risk and current work schedule on the cholelithiasis risk (**Figure 2**). Compared  
249 with day workers who had lower genetic risk, individuals with usual/permanent night shifts and high  
250 genetic risk had the highest risk of cholelithiasis (HR 1.48 [95% CI 1.21, 1.81]).

251

252 **Discussion**

253 In this study, we identified a significant association between night shift work and an increased risk  
254 of cholelithiasis. The risk showed a progressive increase from day work to irregular night shifts and  
255 regular night shifts. Joint analysis revealed that participants with usual/permanent night shift work and  
256 high genetic risk had the highest risk of incident cholelithiasis compared to those with day workers  
257 who had lower genetic risk. Additionally, longer length of each night shift and greater frequency of  
258 night shifts were related to a higher cholelithiasis risk. From a lifestyle perspective, BMI, alcohol  
259 intake, and sedentary time could partially mediate the association between night shift work and  
260 cholelithiasis, with the most notable mediating effect by BMI. These findings shed light on potential  
261 targets for interventions to reduce the subsequent risk of cholelithiasis in population who are at higher  
262 genetic risk.

263 To the best of our knowledge, this is the first prospective cohort study to investigate the  
264 relationships between night shift work and the risk of incident cholelithiasis. While previous research  
265 has extensively studied the association between night shift work and cardiovascular diseases<sup>28,29</sup>,  
266 cancers<sup>30,31</sup>, and metabolic diseases<sup>6</sup>, its adverse effects on the digestive system have been rarely  
267 mentioned. However, some limited studies have reported that associations between shift work and  
268 gastritis<sup>32</sup>, gastroesophageal reflux disease (GERD), irritable bowel syndrome (IBS), nonalcoholic  
269 fatty liver disease (NAFLD)<sup>33,34</sup>, as well as higher odds of certain cancers<sup>35,36</sup>. To some extent, our  
270 results may be partly supported by those findings. For example, Sangyoon Lee et al. proposed that  
271 individuals working night shifts experienced more gastrointestinal symptom. They further found that  
272 those workers had a greater risk of gastritis compared to day workers<sup>32</sup>. Consistently, Hangkai Huang et  
273 al. found that the increased risk of NAFLD among individuals with night shift work was partly

274 attributable to an increase in BMI<sup>34</sup>. Meanwhile, BMI is also recognized as an important risk factor for  
275 cholelithiasis<sup>23</sup>. In this study, we observed that the night shift was a significant and novel risk factor for  
276 cholelithiasis. These findings not only enhance our understanding of the digestive health impacts of  
277 night shifts but also provide crucial evidence for developing primary prevention strategies for  
278 cholelithiasis.

279 Furthermore, we noted that a higher frequency of night shifts and a longer length of each night  
280 shift and were important determinants of increased risk of cholelithiasis. Similarly, Eva et al. enrolled  
281 78,586 women in the Nurses' Health Study and demonstrated that the increasing years of night shifts  
282 was positively related to colorectal cancer risks<sup>36</sup>. Hangkai Huang et al. suggested that a longer  
283 duration, a higher frequency, more consecutive night shift work and longer hours per night shift were  
284 associated with higher risks of NAFLD<sup>34</sup>. All these findings provide evidence on detrimental  
285 relationships between night shift work and health and suggest that reducing the frequency and length of  
286 night shift work might be an effective measure to prevent digestive diseases in night shift workers.

287 The potential mechanism linking night shift work and cholelithiasis remains unclear, but there are  
288 several possible explanations. First, it is well known that circadian disruption, light exposure at night,  
289 and sleep deprivation are characteristic features of night shift work<sup>10</sup>. Evidence from animal studies has  
290 suggested that disordered circadian rhythm and abnormal cholesterol metabolism in mice promote  
291 gallstone formation<sup>37</sup>. Additionally, unhealthy sleep traits may increase the risk of gallbladder disease<sup>38</sup>.  
292 Exposure to light at night can lead to suppression of pineal hormone melatonin and increase in  
293 proinflammatory reactive oxygen species<sup>10</sup>. Meanwhile, inflammatory changes in gall bladder mucosa  
294 and reduced gall bladder motility are considered as risk factors for cholelithiasis<sup>39</sup>. As a result, Sreedevi  
295 et al. suggest that melatonin could be a viable treatment for treat gallstones, targeting reactive oxygen

296 species and the hypomotility of the gall bladder<sup>40</sup>. Second, the expression of genes that encode key  
297 enzymes in hepatic bile acid and cholesterol metabolism, such as *Hmgcr* and *Cyp7a1*, is regulated by  
298 circadian rhythm-related transcription factors<sup>41</sup>. Therefore, the disturbance of circadian rhythm caused  
299 by night work can affect cholesterol metabolism and ultimately lead to the occurrence of cholelithiasis.  
300 In addition, the composition of the gut microbiota also shows circadian fluctuations<sup>42</sup>, which when  
301 disturbed by night work may contribute to the development of cholelithiasis. These findings suggest  
302 that the disturbance of intestinal microbiota among night shift workers may be one of the reasons for  
303 the increased incidence of cholelithiasis. Finally, the circadian disruption can disturb diurnal rhythms in  
304 vagal afferents<sup>43</sup>. The hepatic branch of the vagus nerve plays a critical role in biliary  
305 function. Damage to the hepatic branch can lead to impaired gallbladder contraction, the accumulation  
306 of bile salts, cholestasis, and eventually the formation of gallstones<sup>44</sup>. Therefore, the high incidence of  
307 cholelithiasis among night shift workers may be caused by abnormal vagal afferent rhythm.

308 In our study, after adjusting for lifestyle factors, the association between night shift work and  
309 cholelithiasis was partially attenuated. Mediation analysis indicated that lifestyle factors such as  
310 unhealthy alcohol intake, increased BMI, and sedentary behavior partially explained the relationship  
311 between night shift work and cholelithiasis risk. These findings suggest that while promoting healthy  
312 lifestyles may mitigate some adverse effects of night shift work, additional protective measures are  
313 necessary.

314 We also investigated the interaction between night shift work and genetic predisposition on  
315 cholelithiasis risk. As expected, individuals with high genetic risk who engaged in regular or permanent  
316 night shift work had the highest risk of developing cholelithiasis. These results highlight the need for  
317 personalized prevention strategies and suggest that future primary prevention efforts for night shift

318 workers should consider individual genetic susceptibility.

319       The strength of our study lies in its prospective design, large sample size, long-term follow-up,  
320 and detailed current shift work information. Most importantly, this is the first cohort study to  
321 investigate relationships between night shift work and cholelithiasis risk, while also assessing the  
322 contribution of genetic factors in these relationships. This enabled us to precisely determine the effects  
323 of night shifts on groups with varying levels of susceptibility. Additionally, a series of sensitivity  
324 analyses were conducted to show the robustness of the findings. In addition, we have further clarified  
325 the roles of multiple lifestyle factors, helping to guide and improve strategy development and practice  
326 in health areas related to shift work.

327       Some limitations also remained in our study. First, as an observational study, it cannot establish  
328 causality between night shift work and cholelithiasis. Second, the exposure data was obtained from  
329 questionnaires which included whether participants were involved in night shift work and the  
330 frequency and length of shift work. This method may not be as accurate as measuring exposures using  
331 laboratory parameters. Third, the assessments of current and lifetime employment information in this  
332 study were based on baseline levels rather than being dynamic which may not accurately represent  
333 long-term status. In addition, despite careful adjustment for major confounders, bias from unknown and  
334 unmeasured confounding factors may still exist. Lastly, the study predominantly included white  
335 participants, limiting generalizability to other ethnic groups such as Asians and Blacks. Thus, caution  
336 should be exercised when generalizing these findings to the broader population.

337

### 338 **Conclusions**

339 In conclusion, night shift work, particularly night shift work with higher frequency and longer length,

340 was significantly associated with an increased risk of cholelithiasis and maybe a novel risk factor for  
341 cholelithiasis. Our study also revealed that the risk of cholelithiasis associated with night shift work is  
342 further exacerbated by higher genetic risk. These findings highlight the importance of reducing the  
343 burden of cholelithiasis through intervention of potential mediators.

344

#### 345 **Abbreviations**

346 BMI: Body Mass Index; CI: Confidence interval; GWASs: genome-wide association studies; HR:  
347 Hazard ratio; ICD: International Classification of Diseases; IMD: Index of multiple deprivation;  
348 NDE:Natural direct effect (NDE); NIE: Natural indirect effect; PRS: Polygenic risk score; SNPs:  
349 Single nucleotide polymorphisms; TE: Total effect.

350

#### 351 **Declarations:**

#### 352 **Funding**

353 This work was supported by the Natural Science Foundation of Gansu Province (23JRRA0956);  
354 Medical Innovation and Development Project of Lanzhou University (lzuyxcx-2022-157); The Startup  
355 Fund for the 100 Top Talents Program, SYSU (392012); Research Supporting Start-up Fund for  
356 Associate Researcher of SAHSYSU (ZSQYRSSFAR0004).

#### 357 **Competing interests**

358 The authors declared that no competing interests exist.

#### 359 **Authors' contributions**

360 Wangping He: Conceptualization, Methodology, Writing-Original Draft. Ningning MI: Software, Data  
361 Curation, Visualization, Funding acquisition. Kecheng Jin: Writing-Original Draft. Ruyang Zhong:  
362 Writing-Original Draft. Boru Jin: Writing-Original Draft. Zhen Liu: Writing-Original Draft. Yanyan Lin:



363 Writing-Review & Editing. Ping Yue: Writing-Review & Editing. Bin Xia: Formal analysis, Funding  
364 acquisition. Qiangsheng He: Software, Validation. Jinqiu Yuan: Formal analysis, Supervision, Project  
365 administration, Funding acquisition. Wenbo Meng: Supervision, Project administration, Funding  
366 acquisition.

#### 367 **Ethics approval and consent to participate**

368 Each participant provided a written informed consent before data collection. The UK Biobank obtained  
369 ethics approval from the National Research Ethics Committee (REC ID: 16/NW/0274).

#### 370 **Consent for publication**

371 Not applicable.

#### 372 **Acknowledgements**

373 We thank all participants and researchers from the UK Biobank who make the study possible.

#### 374 **Availability of data and materials**

375 UK Biobank is an open access resource, and the study website <https://www.ukbiobank.ac.uk/> has  
376 information on available data and access procedures. Data sets used for the analysis will be made  
377 available under reasonable requests.

378

#### 379 **Reference**

- 380 1. Lammert F, Gurusamy K, Ko CW, et al. Gallstones. *Nature reviews Disease primers*.  
381 2016;2:16024.
- 382 2. Wang X, Yu W, Jiang G, et al. Global Epidemiology of Gallstones in the 21st Century:  
383 A Systematic Review and Meta-Analysis. *Clinical gastroenterology and hepatology :  
384 the official clinical practice journal of the American Gastroenterological Association*.

- 385 2024;22(8):1586-1595.
- 386 3. Wirth J, Joshi AD, Song M, et al. A healthy lifestyle pattern and the risk of symptomatic  
387 gallstone disease: results from 2 prospective cohort studies. *The American journal of*  
388 *clinical nutrition*. 2020;112(3):586-594.
- 389 4. Kecklund G, Axelsson J. Health consequences of shift work and insufficient sleep.  
390 *BMJ (Clinical research ed)*. 2016;355:i5210.
- 391 5. Vetter C, Fischer D, Matera JL, Roenneberg T. Aligning work and circadian time in  
392 shift workers improves sleep and reduces circadian disruption. *Current biology : CB*.  
393 2015;25(7):907-911.
- 394 6. Wang F, Zhang L, Zhang Y, et al. Meta-analysis on night shift work and risk of  
395 metabolic syndrome. *Obesity reviews : an official journal of the International*  
396 *Association for the Study of Obesity*. 2014;15(9):709-720.
- 397 7. Wei T, Li C, Heng Y, et al. Association between night-shift work and level of melatonin:  
398 systematic review and meta-analysis. *Sleep medicine*. 2020;75:502-509.
- 399 8. Wang N, Sun Y, Zhang H, et al. Long-term night shift work is associated with the risk  
400 of atrial fibrillation and coronary heart disease. *European heart journal*.  
401 2021;42(40):4180-4188.
- 402 9. Xiao Z, Xu C, Liu Q, et al. Night Shift Work, Genetic Risk, and Hypertension. *Mayo*  
403 *Clinic proceedings*. 2022;97(11):2016-2027.
- 404 10. Haus EL, Smolensky MH. Shift work and cancer risk: potential mechanistic roles of  
405 circadian disruption, light at night, and sleep deprivation. *Sleep medicine reviews*.  
406 2013;17(4):273-284.

- 407 11. Ho FK, Celis-Morales C, Gray SR, et al. Association and pathways between shift work  
408 and cardiovascular disease: a prospective cohort study of 238□661 participants from  
409 UK Biobank. *International journal of epidemiology*. 2022;51(2):579-590.
- 410 12. Chuang SC, Hsi E, Lee KT. Genetics of gallstone disease. *Advances in clinical  
411 chemistry*. 2013;60:143-185.
- 412 13. Joshi AD, Andersson C, Buch S, et al. Four Susceptibility Loci for Gallstone Disease  
413 Identified in a Meta-analysis of Genome-Wide Association Studies. *Gastroenterology*.  
414 2016;151(2):351-363.e328.
- 415 14. Ferkingstad E, Oddsson A, Gretarsdottir S, et al. Genome-wide association  
416 meta-analysis yields 20 loci associated with gallstone disease. *Nature  
417 communications*. 2018;9(1):5101.
- 418 15. Crowther ME, Ferguson SA, Reynolds AC. Longitudinal studies of sleep, physical  
419 activity and nutritional intake in shift workers: A scoping review. *Sleep medicine  
420 reviews*. 2022;63:101612.
- 421 16. Schisterman EF, Cole SR, Platt RW. Overadjustment bias and unnecessary  
422 adjustment in epidemiologic studies. *Epidemiology (Cambridge, Mass)*.  
423 2009;20(4):488-495.
- 424 17. Palmer LJ. UK Biobank: bank on it. *Lancet (London, England)*.  
425 2007;369(9578):1980-1982.
- 426 18. Cox N. UK Biobank shares the promise of big data. *Nature*. 2018;562(7726):194-195.
- 427 19. Sudlow C, Gallacher J, Allen N, et al. UK biobank: an open access resource for  
428 identifying the causes of a wide range of complex diseases of middle and old age.

- 429 *PLoS medicine*. 2015;12(3):e1001779.
- 430 20. Vetter C, Dashti HS, Lane JM, et al. Night Shift Work, Genetic Risk, and Type 2  
431 Diabetes in the UK Biobank. *Diabetes care*. 2018;41(4):762-769.
- 432 21. Bycroft C, Freeman C, Petkova D, et al. The UK Biobank resource with deep  
433 phenotyping and genomic data. *Nature*. 2018;562(7726):203-209.
- 434 22. Mi N, Liang Z, Yang M, et al. Genetic risk, adherence to healthy lifestyle behaviors,  
435 and risk of cholelithiasis: A population-based cohort study. *Preventive medicine*.  
436 2024;182:107942.
- 437 23. Lim J, Wirth J, Wu K, et al. Obesity, Adiposity, and Risk of Symptomatic Gallstone  
438 Disease According to Genetic Susceptibility. *Clinical gastroenterology and*  
439 *hepatology : the official clinical practice journal of the American Gastroenterological*  
440 *Association*. 2022;20(5):e1083-e1120.
- 441 24. Craig CL, Marshall AL, Sjöström M, et al. International physical activity questionnaire:  
442 12-country reliability and validity. *Medicine and science in sports and exercise*.  
443 2003;35(8):1381-1395.
- 444 25. Foster HME, Celis-Morales CA, Nicholl BI, et al. The effect of socioeconomic  
445 deprivation on the association between an extended measurement of unhealthy  
446 lifestyle factors and health outcomes: a prospective analysis of the UK Biobank cohort.  
447 *The Lancet Public health*. 2018;3(12):e576-e585.
- 448 26. Rutten-Jacobs LC, Larsson SC, Malik R, et al. Genetic risk, incident stroke, and the  
449 benefits of adhering to a healthy lifestyle: cohort study of 306 473 UK Biobank  
450 participants. *BMJ (Clinical research ed)*. 2018;363:k4168.

- 451 27. Tofighi D, MacKinnon DP. RMediation: an R package for mediation analysis  
452 confidence intervals. *Behavior research methods*. 2011;43(3):692-700.
- 453 28. Vetter C, Devore EE, Wegrzyn LR, et al. Association Between Rotating Night Shift  
454 Work and Risk of Coronary Heart Disease Among Women. *Jama*.  
455 2016;315(16):1726-1734.
- 456 29. Su F, Huang D, Wang H, Yang Z. Associations of shift work and night work with risk of  
457 all-cause, cardiovascular and cancer mortality: a meta-analysis of cohort studies.  
458 *Sleep medicine*. 2021;86:90-98.
- 459 30. Wang F, Yeung KL, Chan WC, et al. A meta-analysis on dose-response relationship  
460 between night shift work and the risk of breast cancer. *Annals of oncology : official  
461 journal of the European Society for Medical Oncology*. 2013;24(11):2724-2732.
- 462 31. Yousef E, Mitwally N, Noufal N, Tahir MR. Shift work and risk of skin cancer: A  
463 systematic review and meta-analysis. *Scientific reports*. 2020;10(1):2012.
- 464 32. Lee S, Chae CH, Park C, Lee HJ, Son J. Relationship of shift work with endoscopic  
465 gastritis among workers of an electronics company. *Scandinavian journal of work,  
466 environment & health*. 2020;46(2):161-167.
- 467 33. Li Q, Li FR, Zhen S, et al. Shift work and risk of incident gastroesophageal reflux  
468 disease: the association and mediation. *Frontiers in public health*. 2023;11:1192517.
- 469 34. Huang H, Liu Z, Xie J, Xu C. Association between night shift work and NAFLD: a  
470 prospective analysis of 281,280 UK Biobank participants. *BMC public health*.  
471 2023;23(1):1282.
- 472 35. Lin Y, Nishiyama T, Kurosawa M, et al. Association between shift work and the risk of

- 473 death from biliary tract cancer in Japanese men. *BMC cancer*. 2015;15:757.
- 474 36. Schernhammer ES, Laden F, Speizer FE, et al. Night-shift work and risk of colorectal  
475 cancer in the nurses' health study. *Journal of the National Cancer Institute*.  
476 2003;95(11):825-828.
- 477 37. He C, Shen W, Chen C, et al. Circadian Rhythm Disruption Influenced Hepatic Lipid  
478 Metabolism, Gut Microbiota and Promoted Cholesterol Gallstone Formation in Mice.  
479 *Frontiers in endocrinology*. 2021;12:723918.
- 480 38. Ma Y, Yu S, Li Q, et al. Sleep patterns, genetic susceptibility, and digestive diseases:  
481 A large-scale longitudinal cohort study. *International journal of surgery (London,*  
482 *England)*. 2024.
- 483 39. E S, Srikanth MS, Shreyas A, et al. Recent advances, novel targets and treatments for  
484 cholelithiasis; a narrative review. *European journal of pharmacology*.  
485 2021;908:174376.
- 486 40. Koppiseti S, Jenigiri B, Terron MP, et al. Reactive oxygen species and the  
487 hypomotility of the gall bladder as targets for the treatment of gallstones with  
488 melatonin: a review. *Digestive diseases and sciences*. 2008;53(10):2592-2603.
- 489 41. Kudo T, Kawashima M, Tamagawa T, Shibata S. Clock mutation facilitates  
490 accumulation of cholesterol in the liver of mice fed a cholesterol and/or cholic acid diet.  
491 *American journal of physiology Endocrinology and metabolism*.  
492 2008;294(1):E120-130.
- 493 42. Bishehsari F, Voigt RM, Keshavarzian A. Circadian rhythms and the gut microbiota:  
494 from the metabolic syndrome to cancer. *Nature reviews Endocrinology*.

495 2020;16(12):731-739.

496 43. Kentish SJ, Christie S, Vincent A, Li H, Wittert GA, Page AJ. Disruption of the light  
 497 cycle ablates diurnal rhythms in gastric vagal afferent mechanosensitivity.  
 498 *Neurogastroenterology and motility*. 2019;31(12):e13711.

499 44. Zhang B, Nie P, Lin Y, et al. High incidence of gallstones after Roux-en-Y  
 500 reconstruction gastrectomy in gastric cancer: a multicenter, long-term cohort study.  
 501 *International journal of surgery (London, England)*. 2024;110(4):2253-2262.

502

**Table 1. Basic characteristics of participants by current work schedule**

| Characteristics                                    | Day workers<br>(N=184817) | Shift, but rarely/some night shifts<br>(N=27518) | Usual/always night shifts<br>(N=7475) | Overall<br>(N=219810) |
|----------------------------------------------------|---------------------------|--------------------------------------------------|---------------------------------------|-----------------------|
| <b>Mean (SD) Age, years</b>                        | 52.7 (7.09)               | 51.7 (7.00)                                      | 51.0 (6.77)                           | 52.5 (7.08)           |
| <b>Gender, N (%)</b>                               |                           |                                                  |                                       |                       |
| Female                                             | 94079 (50.9)              | 12180 (44.3)                                     | 2597 (34.7)                           | 108856 (49.5)         |
| Male                                               | 90738 (49.1)              | 15338 (55.7)                                     | 4878 (65.3)                           | 110954 (50.5)         |
| <b>Mean (SD) Index of multiple deprivation</b>     | 15.6 (12.5)               | 19.7 (14.9)                                      | 21.8 (15.7)                           | 16.3 (13.0)           |
| <b>Mean (SD) body mass index, kg/m<sup>2</sup></b> | 26.9 (4.52)               | 27.7 (4.80)                                      | 28.3 (4.78)                           | 27.1 (4.58)           |
| <b>Health rating, N (%)</b>                        |                           |                                                  |                                       |                       |
| Excellent                                          | 38871 (21.0)              | 4337 (15.8)                                      | 1113 (14.9)                           | 44321 (20.2)          |
| Good                                               | 111484 (60.3)             | 16331 (59.3)                                     | 4324 (57.8)                           | 132139 (60.1)         |
| Poor                                               | 3438 (1.9)                | 760 (2.8)                                        | 242 (3.2)                             | 4440 (2.0)            |
| <b>Long-standing illness, N (%)</b>                | 43420 (23.5)              | 7250 (26.3)                                      | 1951 (26.1)                           | 52621 (23.9)          |
| <b>Education level, N (%)</b>                      |                           |                                                  |                                       |                       |
| A levels/AS levels or equivalent                   | 24058 (13.0)              | 3391 (12.3)                                      | 841 (11.3)                            | 28290 (12.9)          |
| College or University degree                       | 81664 (44.2)              | 7502 (27.3)                                      | 1267 (16.9)                           | 90433 (41.1)          |
| CSEs or equivalent                                 | 10410 (5.6)               | 2569 (9.3)                                       | 925 (12.4)                            | 13904 (6.3)           |
| NVQ or HND or HNC or equivalent                    | 10956 (5.9)               | 2578 (9.4)                                       | 827 (11.1)                            | 14361 (6.5)           |
| O levels/GCSEs or equivalent                       | 37304 (20.2)              | 6712 (24.4)                                      | 2074 (27.7)                           | 46090 (21.0)          |
| Other                                              | 6939 (3.8)                | 1579 (5.7)                                       | 545 (7.3)                             | 9063 (4.1)            |
| <b>White, N (%)</b>                                | 175902 (95.2)             | 24850 (90.3)                                     | 6553 (87.7)                           | 207305 (94.3)         |
| <b>Multivitamin use, N (%)</b>                     | 26105 (14.1)              | 3924 (14.3)                                      | 926 (12.4)                            | 30955 (14.1)          |
| <b>Intake of mineral supplements, N (%)</b>        | 41155 (22.3)              | 6333 (23.0)                                      | 1628 (21.8)                           | 49116 (22.3)          |
| <b>Dietary characteristics, N (%)</b>              |                           |                                                  |                                       |                       |
| Unhealthy diet                                     | 93734 (50.7)              | 14471 (52.6)                                     | 4190 (56.1)                           | 112395 (51.1)         |
| Healthy diet                                       | 91083 (49.3)              | 13047 (47.4)                                     | 3285 (43.9)                           | 107415 (48.9)         |
| <b>Smoking status, N (%)</b>                       |                           |                                                  |                                       |                       |

|                                 |                |               |              |                |
|---------------------------------|----------------|---------------|--------------|----------------|
| Current                         | 17394 (9.4)    | 3895 (14.2)   | 1228 (16.4)  | 22517 (10.2)   |
| Never                           | 167423 (90.6)  | 23623 (85.8)  | 6247 (83.6)  | 197293 (89.8)  |
| <b>Alcohol intake, N (%)</b>    |                |               |              |                |
| Healthy alcohol intake          | 175203 (94.8%) | 25495 (92.6%) | 6794 (90.9%) | 207492 (94.4%) |
| Unhealthy alcohol intake        | 9614 (5.2%)    | 2023 (7.4%)   | 681 (9.1%)   | 12318 (5.6%)   |
| <b>Physical activity, N (%)</b> |                |               |              |                |
| Healthy physical activity       | 146714 (79.4)  | 23411 (85.1)  | 6513 (87.1)  | 176638 (80.4)  |
| Unhealthy physical activity     | 38103 (20.6)   | 4107 (14.9)   | 962 (12.9)   | 43172 (19.6)   |
| <b>Sleep duration, N (%)</b>    |                |               |              |                |
| Healthy sleep duration          | 139745 (75.6)  | 19007 (69.1)  | 4530 (60.6)  | 163282 (74.3)  |
| Unhealthy sleep duration        | 45072 (24.4)   | 8511 (30.9)   | 2945 (39.4)  | 56528 (25.7)   |
| <b>Watch TV, N (%)</b>          |                |               |              |                |
| Healthy TV viewing time         | 153273 (82.9)  | 21508 (78.2)  | 5426 (72.6)  | 180207 (82.0)  |
| Unhealthy TV viewing time       | 31544 (17.1)   | 6010 (21.8)   | 2049 (27.4)  | 39603 (18.0)   |

503

504

**Table 2. Current night shift work and cholelithiasis in the UK Biobank**

| Variables       | HR (95% CI) by current work schedule |                                     |                               | P for trend |
|-----------------|--------------------------------------|-------------------------------------|-------------------------------|-------------|
|                 | Day workers                          | Shift, but rarely/some night shifts | Usual/ permanent night shifts |             |
| Cases           | 5292                                 | 899                                 | 259                           |             |
| Person-years    | 2485075.9                            | 367718.5                            | 100067.0                      |             |
| Incidence rate* | 21.30                                | 24.45                               | 25.88                         |             |
| Model 1         | 1.00 (ref)                           | 1.21 (1.13-1.30)                    | 1.36 (1.20-1.55)              | <0.001      |
| Model 2         | 1.00 (ref)                           | 1.12 (1.04-1.21)                    | 1.22 (1.07-1.39)              | <0.001      |
| Model 3         | 1.00 (ref)                           | 1.09 (1.01-1.17)                    | 1.18 (1.04-1.35)              | 0.001       |

505 Abbreviations: ref= reference.

506 \*Per 10,000 person-years.

507 Model 1 stratified by age, sex and UK Biobank assessment centers; Model 2 further adjusted for race, index of multiple

508 deprivation and education level; Model 3 adjusted for terms in Model 2 and health rating, long-standing illness, multivitamin use

509 and mineral use.

510

511

512

513

514

**Table 3. Association between current shift work and cholelithiasis by adjustment schemes.**

| Variables | HR (95% CI) by current work schedule |                                     |                               | P for trend |
|-----------|--------------------------------------|-------------------------------------|-------------------------------|-------------|
|           | Day workers                          | Shift, but rarely/some night shifts | Usual/ permanent night shifts |             |



|                                                    |            |                  |                  |        |
|----------------------------------------------------|------------|------------------|------------------|--------|
| <b>Cases</b>                                       | 5292       | 899              | 259              |        |
| <b>Person-years</b>                                | 2485075.9  | 367718.5         | 100067.0         |        |
| <b>Incidence rate*</b>                             | 21.30      | 24.45            | 25.88            |        |
| <b>Model 1</b>                                     | 1.00 (ref) | 1.09 (1.01-1.17) | 1.18 (1.04-1.35) | 0.001  |
| <b>Model 2 (Model 1 + dietary characteristics)</b> | 1.00 (ref) | 1.09 (1.01-1.17) | 1.18 (1.04-1.35) | 0.001  |
| <b>Model 3 (Model 1 + smoking status)</b>          | 1.00 (ref) | 1.08 (1.01-1.17) | 1.18 (1.04-1.34) | 0.002  |
| <b>Model 4 (Model 1 + alcohol intake)</b>          | 1.00 (ref) | 1.09 (1.01-1.17) | 1.18 (1.04-1.34) | 0.001  |
| <b>Model 5 (Model 1 + physical activity)</b>       | 1.00 (ref) | 1.10 (1.02-1.19) | 1.21 (1.06-1.37) | <0.001 |
| <b>Model 6 (Model 1 + sleep duration)</b>          | 1.00 (ref) | 1.09 (1.01-1.17) | 1.18 (1.04-1.34) | 0.002  |
| <b>Model 7 (Model 1 + TV viewing<sup>†</sup>)</b>  | 1.00 (ref) | 1.08 (1.01-1.17) | 1.17 (1.03-1.33) | 0.002  |
| <b>Model 8 (Model 1 + BMI)</b>                     | 1.00 (ref) | 1.05 (0.98-1.13) | 1.12 (0.99-1.28) | 0.032  |

515 Abbreviations: ref=reference, BMI= body mass index.

516 \*Per 10,000 person-years.

517 <sup>†</sup>TV viewing was used to measure sedentary time.

518 Model 1 stratified by age, sex, and UK Biobank assessment centers and additionally adjusted for race, index of multiple

519 deprivation, education level, health rating, long-standing illness, multivitamin use and mineral use.

520

521

**Table 4. Summary of Mediation Analyses**

| Characteristics                               | Incident cholelithiasis                  |                                       |            |
|-----------------------------------------------|------------------------------------------|---------------------------------------|------------|
|                                               | Association with shift work <sup>a</sup> | Association with outcome <sup>b</sup> | % Mediated |
| <b>Unhealthy dietary</b>                      | -                                        | +                                     | NA         |
| <b>Current smoking</b>                        | +                                        | 0                                     | NA         |
| <b>Unhealthy alcohol intake</b>               | +                                        | +                                     | 4.5        |
| <b>Low physical activity</b>                  | -                                        | +                                     | NA         |
| <b>Unhealthy sleep duration</b>               | +                                        | 0                                     | NA         |
| <b>Unhealthy TV viewing or sedentary time</b> | +                                        | +                                     | 1.8        |
| <b>BMI</b>                                    | +                                        | +                                     | 24.6       |

522 Abbreviations: +: positive association; -: negative association; 0: no significant association; BMI: body mass index; TV:

523 television; NA: not available.

524 <sup>a</sup> Summarized from **Supplementary Table S3**; multiple linear or logistic regression models with the potential mediator as the

525 dependent variable and night shift work as the independent variable. Stratified by age, sex, and UK Biobank assessment centers

526 and additionally adjusted for each other and for race, index of multiple deprivation, education level, health rating, long-standing

527 illness, multivitamin use and mineral use.

528 <sup>b</sup> Summarized from **Supplementary Table S4**; Cox regression models with potential mediators as independent variables.  
 529 Stratified by age, sex, and UK Biobank assessment centers and additionally adjusted for each other and for race, index of  
 530 multiple deprivation, education level, health rating, long-standing illness, multivitamin use and mineral use.  
 531  
 532  
 533  
 534  
 535

**Table 5. Average lifetime night shift frequency and risk of cholelithiasis**

| Variables       | HR (95% CI) by average lifetime night shift frequency |                  |                  | P for trend |
|-----------------|-------------------------------------------------------|------------------|------------------|-------------|
|                 | None                                                  | <8/month         | ≥8/month         |             |
| Cases           | 1122                                                  | 232              | 224              |             |
| Person-years    | 645107.98                                             | 111648.07        | 92601.68         |             |
| Incidence rate* | 17.39                                                 | 20.78            | 24.19            |             |
| Model 1         | 1.00 (ref)                                            | 1.26 (1.10-1.46) | 1.48 (1.28-1.71) | <0.001      |
| Model 2         | 1.00 (ref)                                            | 1.20 (1.04-1.39) | 1.31 (1.13-1.53) | <0.001      |
| Model 3         | 1.00 (ref)                                            | 1.18 (1.02-1.37) | 1.26 (1.08-1.46) | 0.001       |

536 Abbreviations: ref= reference.  
 537 \*Per 10,000 person-years.  
 538 Model 1 stratified for age, sex and UK Biobank assessment centers; Model 2 further adjusted for race, index of multiple  
 539 deprivation and education level; Model 3 adjusted for terms in Model 2 and health rating, long-standing illness, multivitamin use  
 540 and mineral use.  
 541  
 542  
 543  
 544  
 545

**Table 6. Average length of each night shift and risk of cholelithiasis**

| Variables       | HR (95% CI) by average length of each night shift during night shift periods |                  |                  |                  | P for trend |
|-----------------|------------------------------------------------------------------------------|------------------|------------------|------------------|-------------|
|                 | None                                                                         | ≤8h              | 8-12h            | ≥12h             |             |
| Cases           | 1122                                                                         | 166              | 126              | 164              |             |
| Person-years    | 645107.98                                                                    | 76709.80         | 56175.72         | 71364.23         |             |
| Incidence rate* | 17.39                                                                        | 21.64            | 22.43            | 22.98            |             |
| Model 1         | 1.00 (ref)                                                                   | 1.40 (1.18-1.65) | 1.29 (1.07-1.55) | 1.38 (1.17-1.63) | <0.001      |
| Model 2         | 1.00 (ref)                                                                   | 1.27 (1.07-1.51) | 1.18 (0.97-1.42) | 1.30 (1.09-1.53) | <0.001      |
| Model 3         | 1.00 (ref)                                                                   | 1.23 (1.04-1.46) | 1.16 (0.95-1.40) | 1.25 (1.06-1.48) | 0.002       |

546 Abbreviations: ref= reference.  
 547 \*Per 10,000 person-years.  
 548 Model 1 stratified for age, sex and UK Biobank assessment centers; Model 2 further adjusted for race, index of multiple  
 549 deprivation and education level; Model 3 adjusted for terms in Model 2 and health rating, long-standing illness, multivitamin use  
 550 and mineral use.

551  
552  
553  
554  
555  
556  
557  
558  
559  
560  
561  
562  
563  
564  
565  
566  
567  
568  
569  
570  
571  
572  
573  
574  
575  
576  
577  
578  
579  
580  
581  
582

**Figure 1. Kaplan-Meier curves of time to cumulative incidence of cholelithiasis by night shift work.**

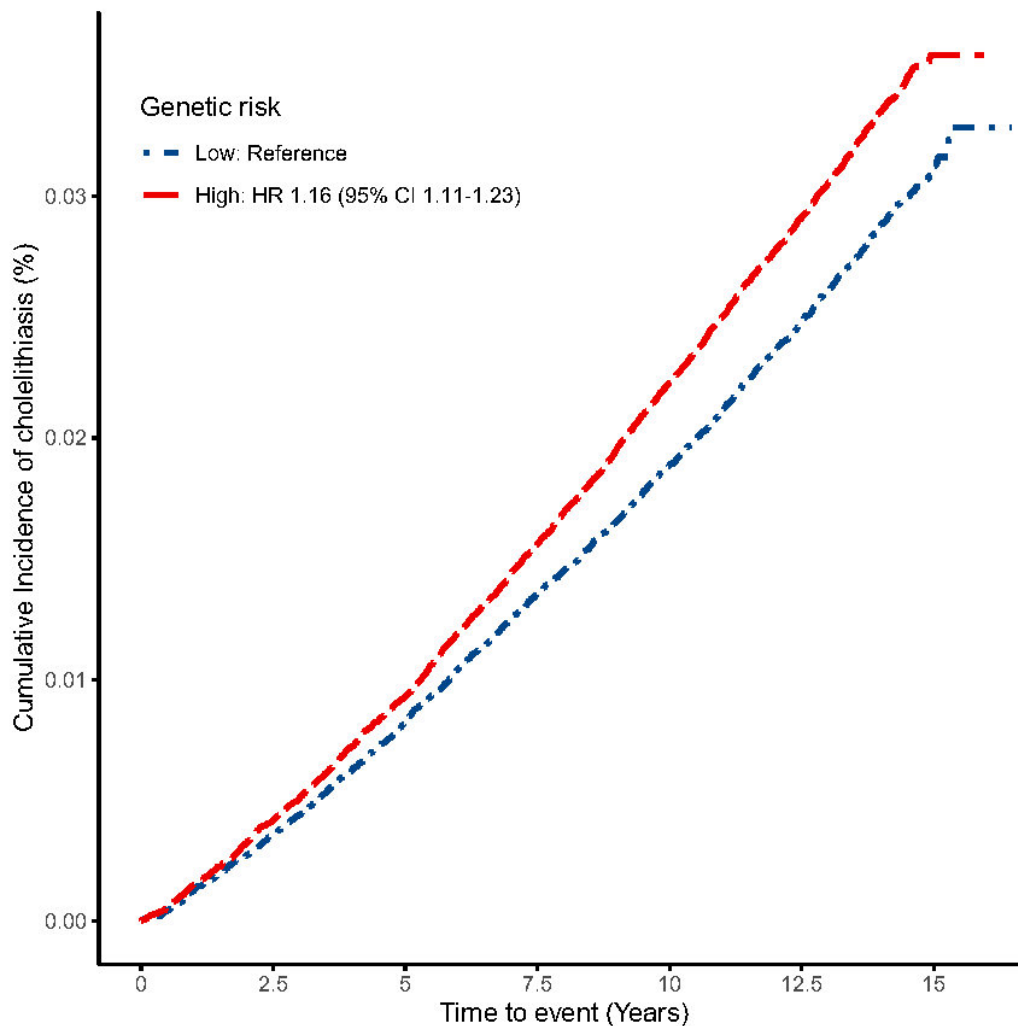

583  
584  
585  
586  
587  
588  
589  
590  
591  
592  
593  
594  
595  
596  
597  
598

**Figure 2. Joint effects of genetic risk with current work schedule on cholelithiasis risk.**

| Characteristics                     | Cases / Person-years | HR (95%CI) | HR (95%CI)       | P value |
|-------------------------------------|----------------------|------------|------------------|---------|
| <b>Low genetic risk</b>             |                      |            |                  |         |
| Day workers                         | 1,893 / 939,087      |            | 1.00 (ref)       |         |
| Shift, but rarely/some night shifts | 328 / 131,314        |            | 1.14 (1.01-1.28) | 0.034   |
| Usual/permanent night shifts        | 65 / 35,439          |            | 0.87 (0.68-1.12) | 0.284   |
| <b>High genetic risk</b>            |                      |            |                  |         |
| Day workers                         | 2,236 / 951,310      |            | 1.16 (1.09-1.23) | <0.001  |
| Shift, but rarely/some night shifts | 349 / 131,625        |            | 1.23 (1.09-1.38) | 0.001   |
| Usual/permanent night shifts        | 104 / 34,257         |            | 1.48 (1.21-1.81) | <0.001  |

599

600

601

602

603

Hazard ratios were stratified by age, sex and UK Biobank assessment centers and additionally adjusted for race, index of multiple deprivation, education level, health rating, long-standing illness, multivitamin use and mineral use.
